# Supplementary material for: Identification and removal of sequencing artifacts produced by mispriming during reverse transcription in multiple RNA-seq technologies
Source: PubMed Central journal article supplement — RNA. 2018 Sep;24(9):1266–74. doi: 10.1261/rna.066217.118 (PMC6097653; doi:10.1261/rna.066217.118), 2018-09
Supplement: supp_066217.118_Supplemental_Material.pdf [file supp_066217.118_Supplemental_Material.pdf]

Figure S2

**A**

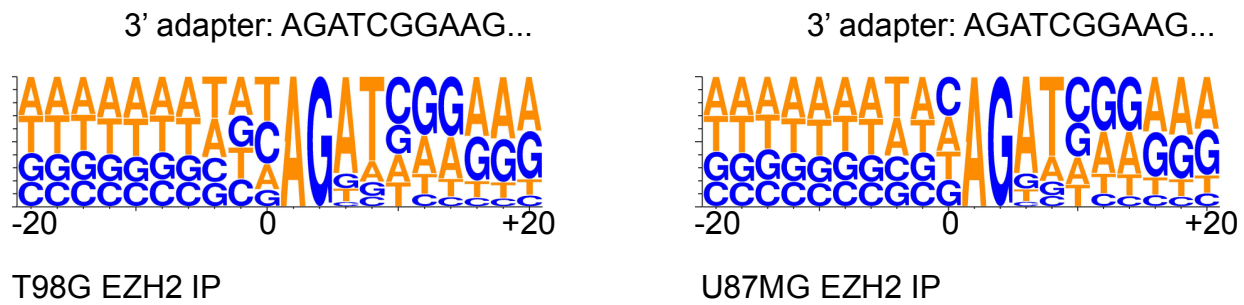

**B**

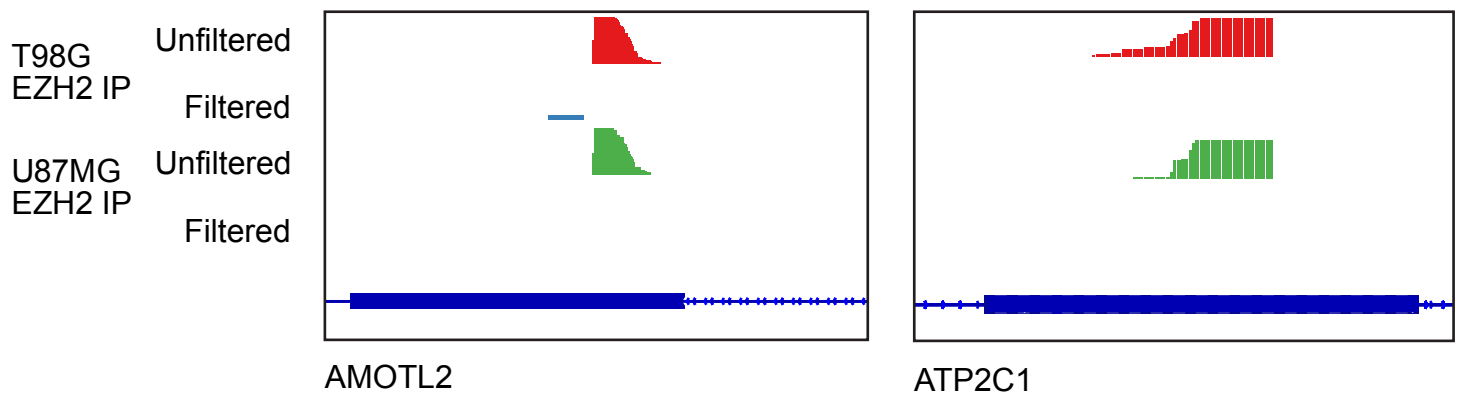

**C**

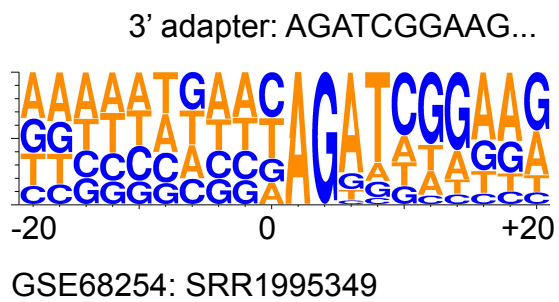

SRR1995349

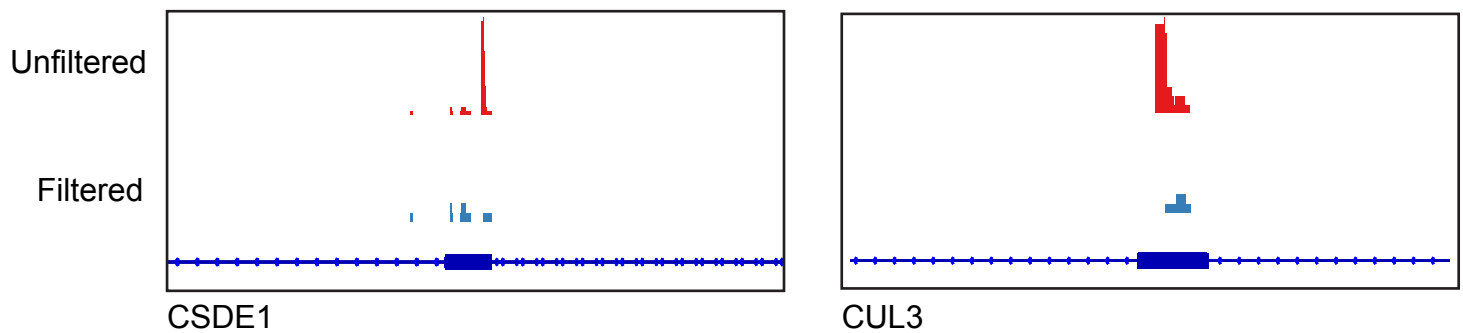

**A**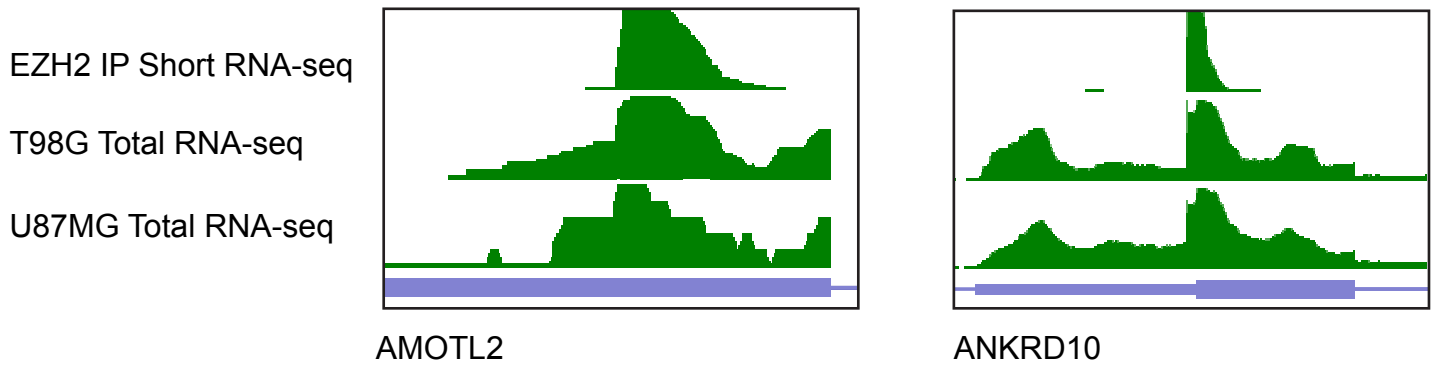**B**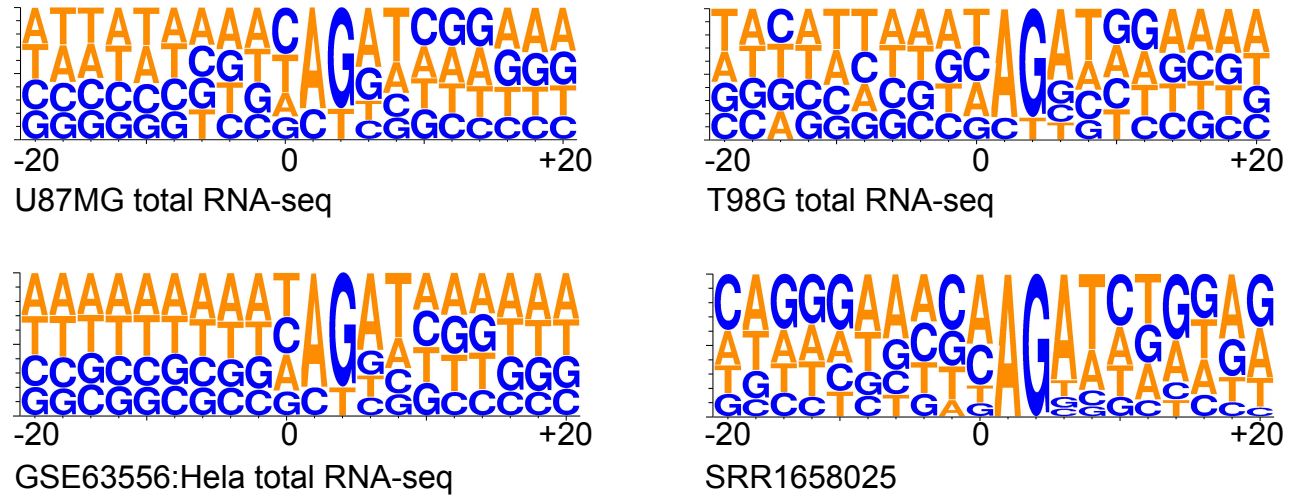

Figure S4

A

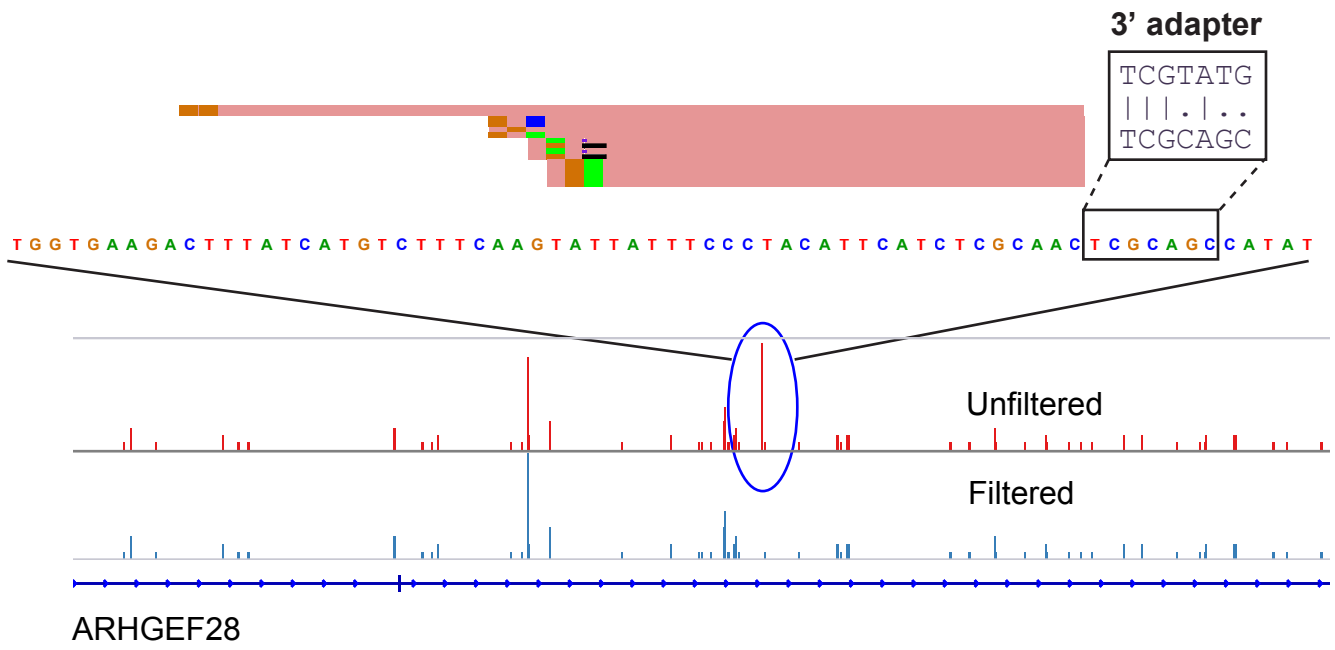

B

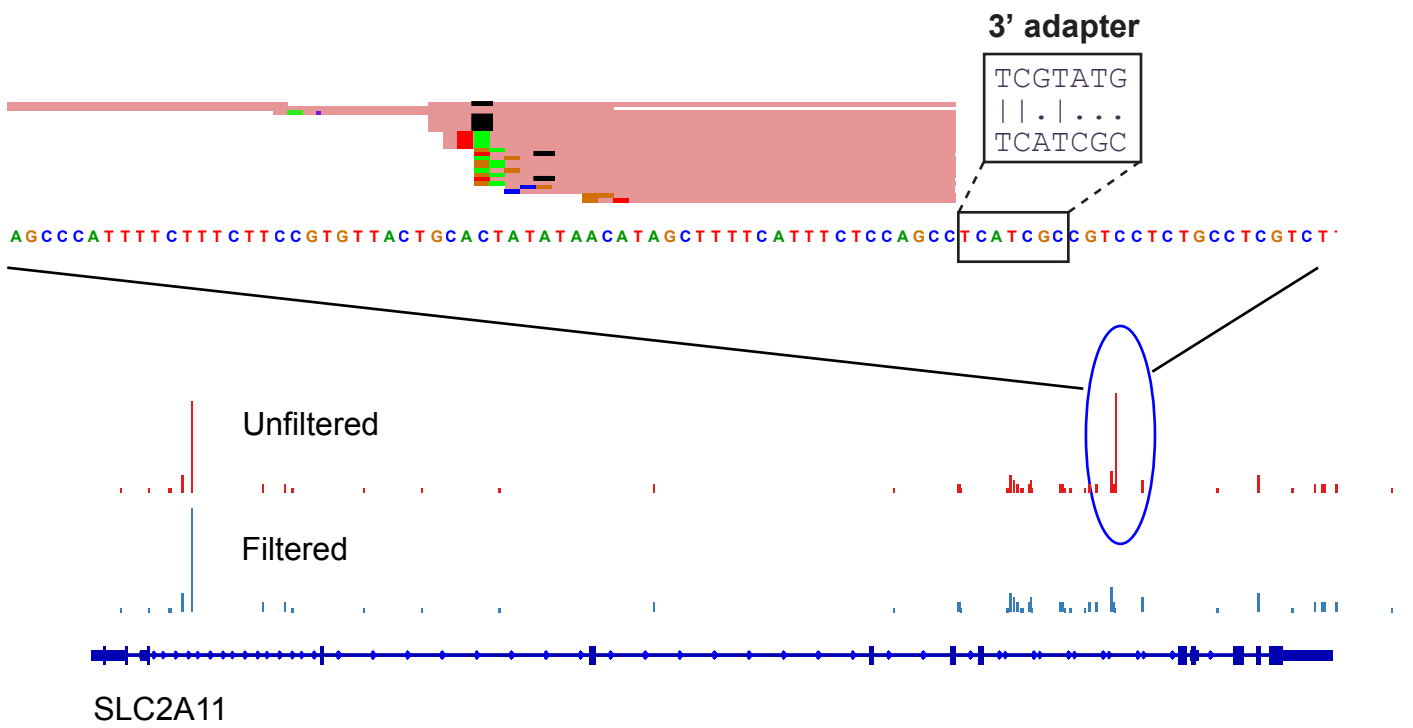

Figure S5

**A**

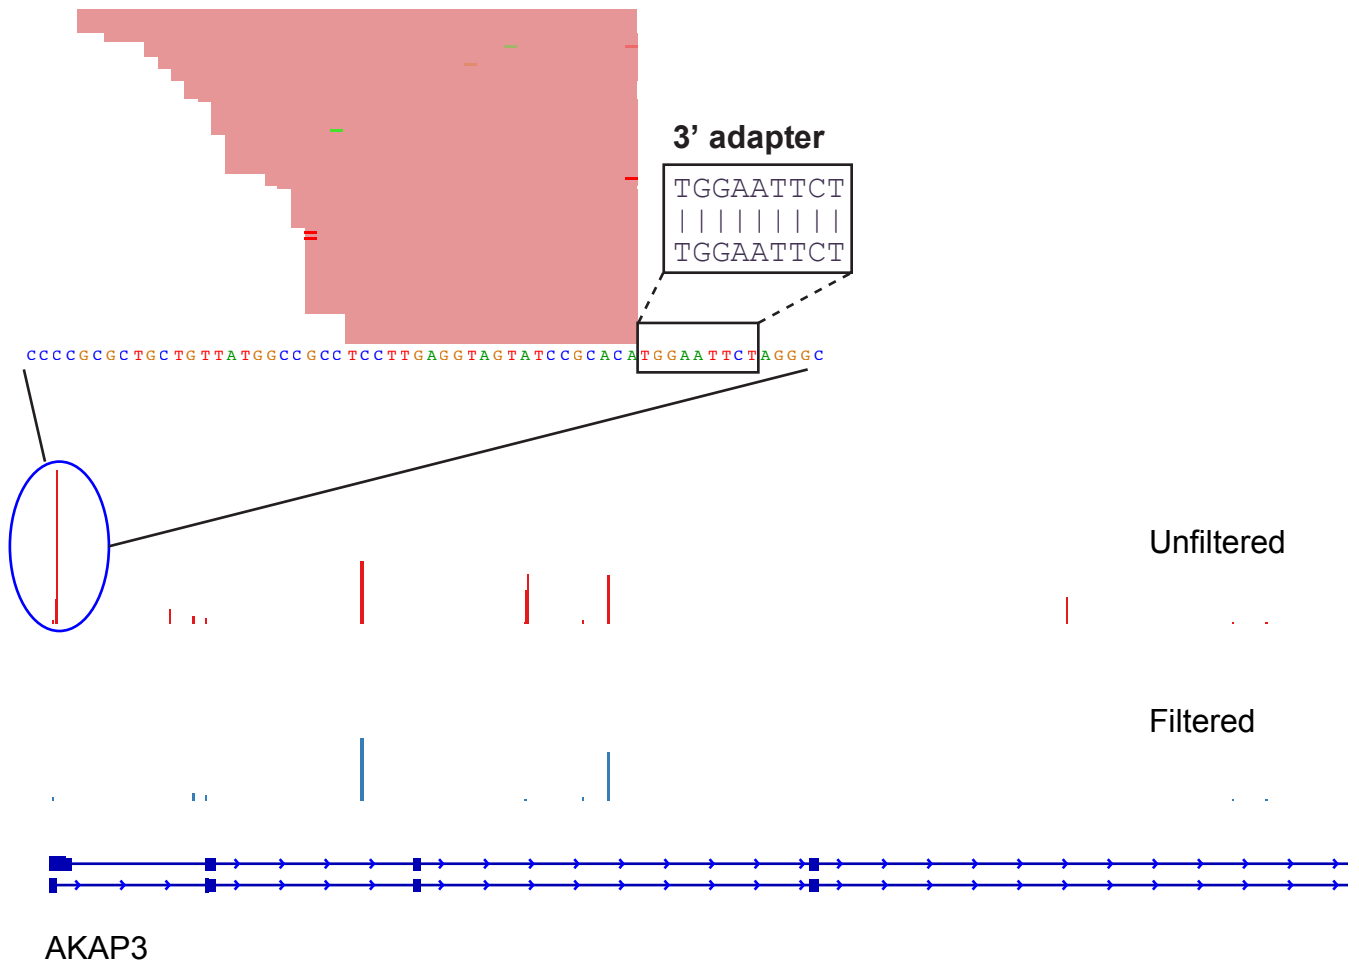

**B**

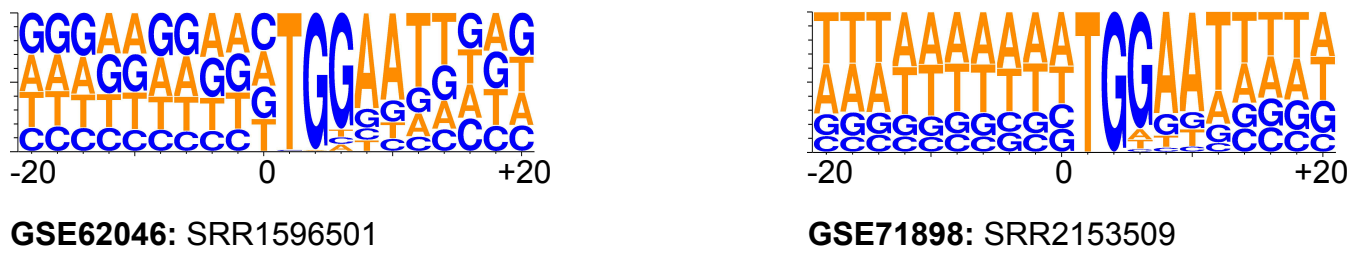

**Supplementary Table 1:** RT mispriming events identified by our pipeline in published datasets.

| <b>Study</b> | <b>Accession</b> | <b>Technique</b> | <b>Number of mispriming sites</b> | <b>Number of misprimed reads</b> | <b>Percent of reads misprimed</b> |
|--------------|------------------|------------------|-----------------------------------|----------------------------------|-----------------------------------|
| GSE68254     | SRR1995349       | Short RNA-seq    | 2773                              | 75105                            | 0.587                             |
| GSE63556     | SRR1660042       | RNA-seq          | 4004                              | 55688                            | 0.082                             |
| GSE63556     | SRR1660043-45    | RNA-seq          | 3858                              | 44165                            | 0.073                             |
| GSE63496     | SRR1658024       | RNA-seq          | 122                               | 3145                             | 0.020                             |
| GSE63496     | SRR1658025       | RNA-seq          | 136                               | 3601                             | 0.020                             |
| GSE62047     | SRR1596500       | GRO-seq          | 10496                             | 236794                           | 0.849                             |
| GSE62047     | SRR1596501       | GRO-seq          | 2926                              | 44319                            | 0.141                             |
| GSE71901     | SRR2153508       | GRO-seq          | 104293                            | 4720754                          | 5.098                             |
| GSE71901     | SRR2153509       | GRO-seq          | 109035                            | 4866057                          | 5.608                             |
| GSE71901     | SRR2153510       | GRO-seq          | 40897                             | 4175377                          | 4.167                             |
| GSE41357     | SRR580356        | HITS-CLIP        | 4305                              | 514864                           | 3.285                             |
| GSE41357     | SRR580357        | HITS-CLIP        | 2239                              | 366095                           | 2.898                             |
| GSE42701     | SRR628446        | HITS-CLIP        | 3241                              | 69343                            | 0.802                             |

**Supplementary Table 2:** RT mispriming events identified by our pipeline in mRNA-seq and short RNA-seq datasets we generated.

| <b>Sample</b>           | <b>Technique</b> | <b>Number of mispriming sites</b> | <b>Number of misprimed reads</b> | <b>Percent of reads misprimed</b> |
|-------------------------|------------------|-----------------------------------|----------------------------------|-----------------------------------|
| T98G EZH2 IP BR1        | Short RNA-seq    | 36558                             | 1531591                          | 44.070                            |
| T98G EZH2 IP BR2        | Short RNA-seq    | 37203                             | 1704240                          | 28.926                            |
| T98G IgG IP BR1         | Short RNA-seq    | 10439                             | 227480                           | 2.766                             |
| T98G IgG IP BR2         | Short RNA-seq    | 12968                             | 302368                           | 3.808                             |
| T98G Input BR1          | Short RNA-seq    | 1318                              | 32800                            | 0.267                             |
| T98G Input BR2          | Short RNA-seq    | 3009                              | 91975                            | 0.514                             |
| U87MG EZH2 IP BR1       | Short RNA-seq    | 1878                              | 49135                            | 4.870                             |
| U87MG EZH2 IP BR2       | Short RNA-seq    | 46293                             | 2380088                          | 54.748                            |
| U87MG IgG IP BR1        | Short RNA-seq    | 591                               | 11015                            | 1.040                             |
| U87MG IgG IP BR2        | Short RNA-seq    | 19981                             | 535942                           | 8.182                             |
| U87MG Input BR1         | Short RNA-seq    | 67                                | 1770                             | 0.069                             |
| U87MG Input BR2         | Short RNA-seq    | 1920                              | 57762                            | 0.593                             |
| U87MG Total RNA-seq BR1 | RNA-seq          | 2890                              | 37395                            | 0.066                             |
| U87MG Total RNA-seq BR2 | RNA-seq          | 3638                              | 45185                            | 0.064                             |
